# Supplementary material for: Moss Biomonitoring of Atmospheric Pollution with Trace Elements in the Moscow Region, Russia
Source: MDPI journal article supplement (doi:10.3390/toxics10020066), 2022-02-02
Supplement: s1 [file s1]

# Supplementary Materials: Moss Biomonitoring of Atmospheric Pollution with Trace Elements in the Moscow Region, Russia

Konstantin Vergel, Inga Zinicovskaia, Nikita Yushin, Omari Chaligava, Pavel Nekhoroshkov and Dmitrii Grozdov

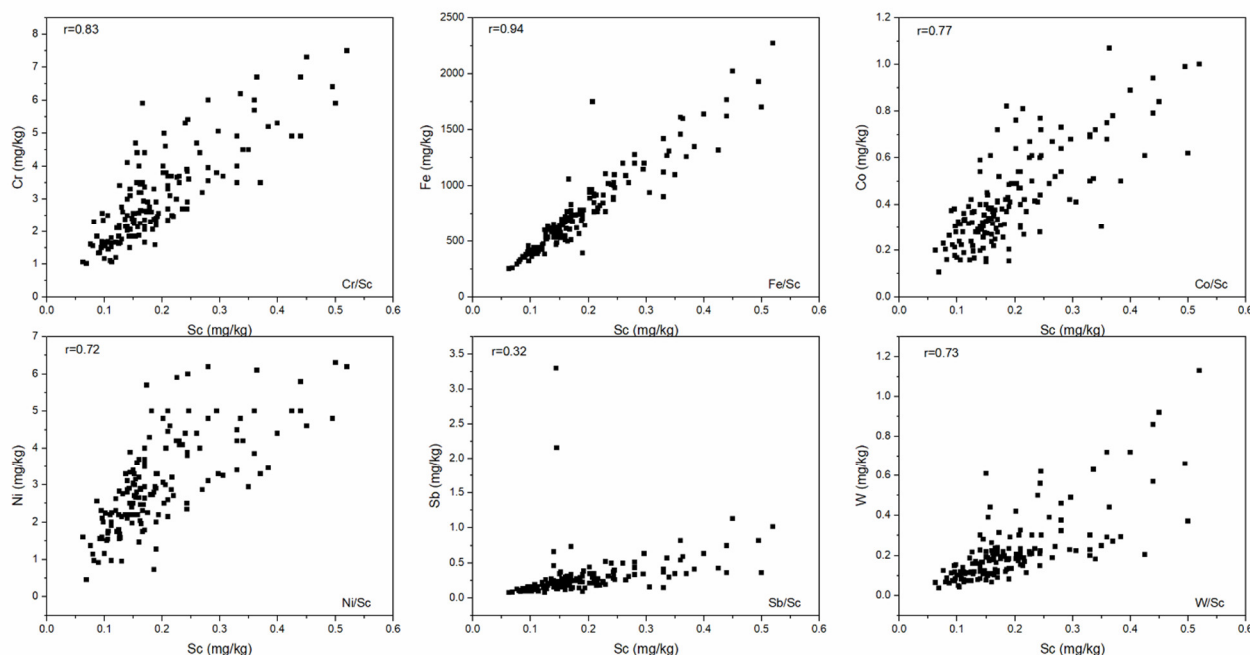

**Figure S1.** The ratio of the content of each element in Factor 2 versus Sc content in moss samples.

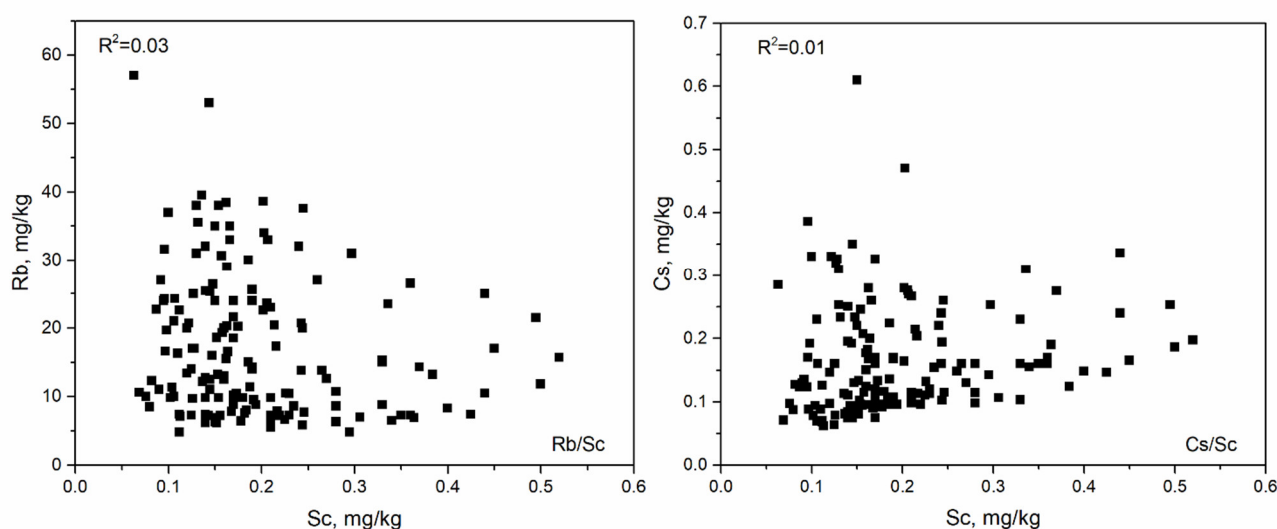

**Figure S2.** The ratio of the content of each element in Factor 3 versus Sc content in moss samples.

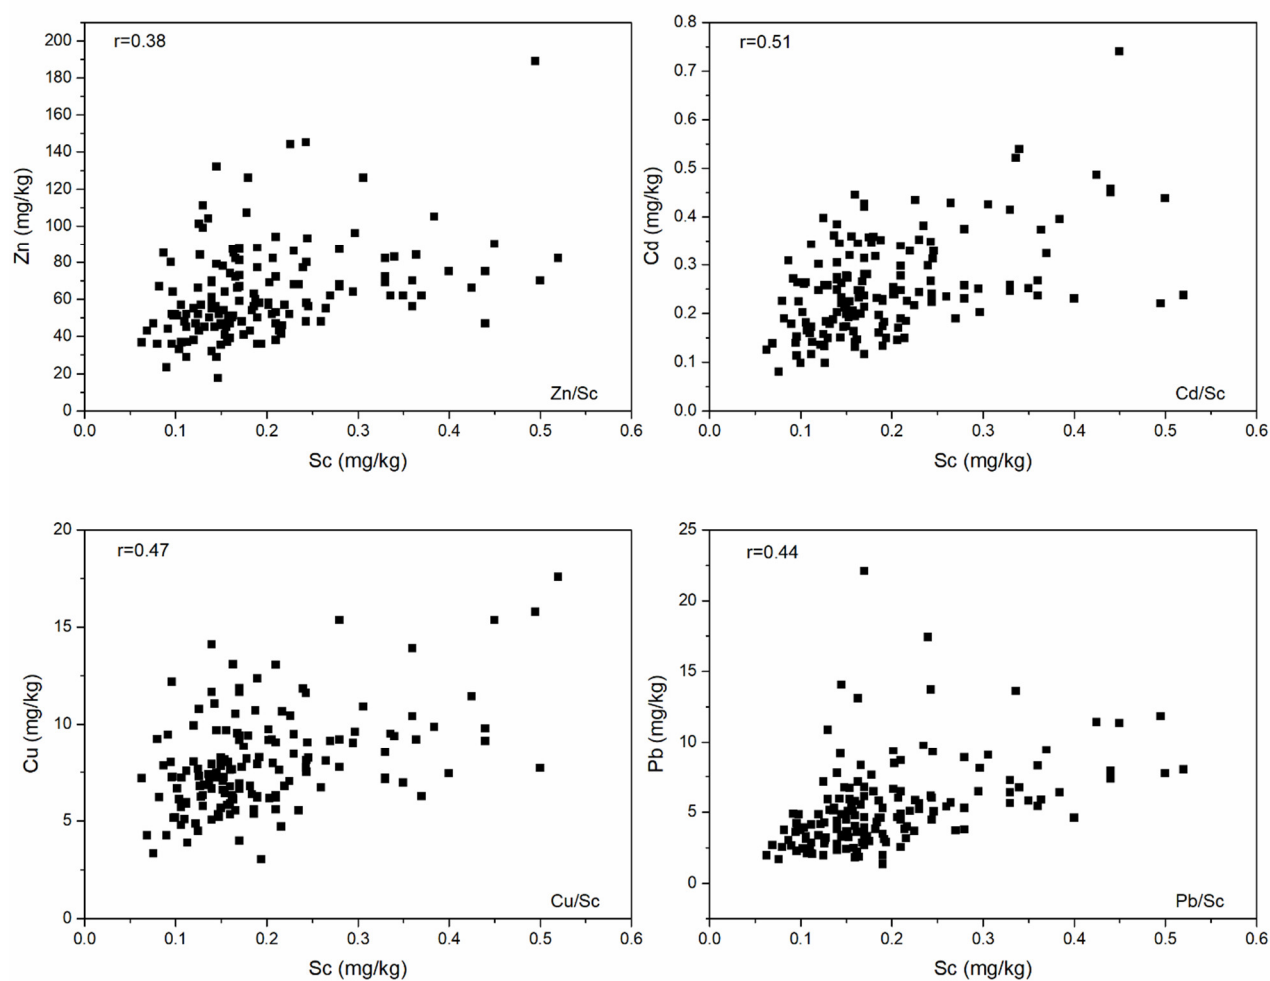

**Figure S3.** The ratio of the content of each element in Factor 4 versus Sc content in moss samples.

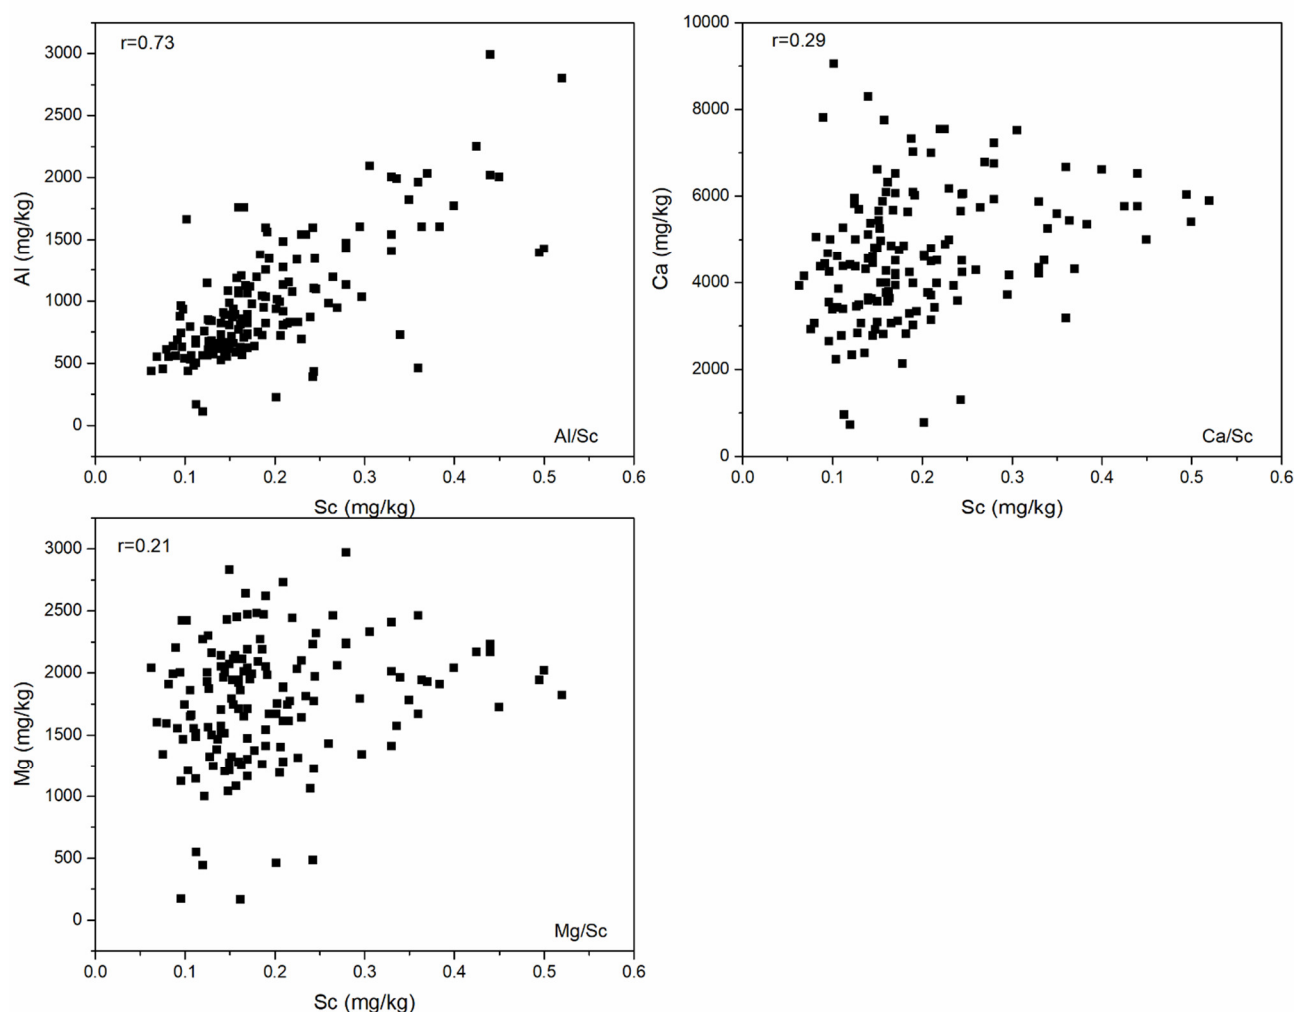

**Figure S4.** The ratio of the content of each element in Factor 5 versus Sc content in moss samples.

**Table S1** Information about sampling sites

| Sample site | Coordinates |          | Description                         |
|-------------|-------------|----------|-------------------------------------|
|             | Longitude   | Latitude |                                     |
| 1           | 37,356      | 56,486   | Coniferous forest                   |
| 2           | 37,187      | 56,580   | Mixed forest                        |
| 3           | 36,974      | 56,495   | Forest belt near agricultural field |
| 4           | 36,622      | 56,479   | Mixed forest                        |
| 5           | 36,368      | 56,422   | Mixed forest                        |
| 6           | 36,588      | 56,319   | Spruce and birch forest             |
| 7           | 36,709      | 56,178   | Coniferous forest                   |
| 8           | 36,938      | 56,094   | Coniferous forest                   |
| 9           | 37,044      | 56,277   | birch forest                        |
| 10          | 37,029      | 56,350   | Mixed forest                        |
| 11          | 37,176      | 56,306   | Mixed forest                        |
| 12          | 37,270      | 56,272   | Mixed forest                        |
| 13          | 37,213      | 56,110   | suburban area.                      |
| 14          | 37,340      | 56,025   | Waste dump                          |
| 15          | 37,299      | 55,914   | Mixed forest                        |

|    |        |        |                                       |
|----|--------|--------|---------------------------------------|
| 16 | 37,025 | 56,000 | Mixed forest                          |
| 17 | 36,780 | 55,988 | Mixed forest                          |
| 18 | 36,496 | 55,925 | Mixed forest                          |
| 19 | 36,439 | 56,112 | Mixed forest                          |
| 20 | 36,256 | 56,294 | Mixed forest                          |
| 21 | 36,061 | 56,204 | Pine forest                           |
| 22 | 35,853 | 56,267 | Nature reserve Zavidovo, mixed forest |
| 23 | 35,730 | 56,315 | Birch forest                          |
| 24 | 35,510 | 56,431 | Birch an pine forest                  |
| 25 | 35,621 | 56,279 | Mixed forest                          |
| 26 | 35,392 | 56,184 | Mixed forest                          |
| 27 | 35,643 | 56,074 | Mixed forest                          |
| 28 | 35,917 | 56,103 | Mixed forest                          |
| 29 | 36,322 | 56,029 | Mixed forest                          |
| 30 | 36,124 | 56,056 | Mixed forest                          |
| 31 | 35,810 | 56,027 | Mixed forest                          |
| 32 | 36,051 | 55,917 | Mixed forest                          |
| 33 | 35,797 | 55,819 | Mixed forest                          |
| 34 | 35,619 | 55,932 | Mixed forest                          |
| 35 | 35,501 | 56,022 | Mixed forest                          |
| 36 | 35,251 | 55,862 | Mixed forest                          |
| 37 | 35,541 | 55,759 | Pine forest                           |
| 38 | 35,318 | 55,564 | Coniferous forest                     |
| 39 | 35,431 | 55,417 | Spruce forest                         |
| 40 | 35,420 | 55,258 | Spruce and birch forest               |
| 41 | 35,624 | 55,521 | Spruce and birch forest               |
| 42 | 35,593 | 55,314 | Spruce and birch forest               |
| 43 | 35,824 | 55,345 | Spruce forest                         |
| 44 | 35,809 | 55,641 | Mixed forest                          |
| 45 | 36,164 | 55,632 | Spruce forest                         |
| 46 | 36,252 | 55,714 | Spruce forest                         |
| 47 | 36,657 | 55,728 | Mixed forest                          |
| 48 | 36,856 | 55,729 | Mixed forest                          |
| 49 | 36,939 | 55,673 | Mixed forest                          |
| 50 | 36,764 | 55,601 | Mixed forest                          |
| 51 | 36,432 | 55,617 | Mixed forest                          |
| 52 | 36,339 | 55,624 | Mixed forest                          |
| 53 | 36,090 | 55,402 | Spruce forest                         |
| 54 | 36,000 | 55,212 | Mixed forest                          |
| 55 | 36,298 | 55,293 | Mixed forest                          |
| 56 | 36,664 | 55,387 | Mixed forest                          |
| 57 | 36,921 | 55,270 | Mixed forest                          |
| 58 | 36,942 | 55,454 | Mixed forest                          |
| 59 | 37,221 | 55,543 | Spruce forest                         |
| 60 | 37,405 | 55,541 | Mixed forest                          |
| 61 | 37,300 | 55,395 | Mixed forest                          |
| 62 | 37,159 | 55,245 | Mixed forest                          |
| 63 | 37,221 | 54,962 | Mixed forest                          |
| 64 | 37,828 | 54,875 | Pine forest                           |

|     |        |        |                                           |
|-----|--------|--------|-------------------------------------------|
| 65  | 37,668 | 54,901 | Pine forest                               |
| 66  | 37,468 | 54,965 | Mixed forest                              |
| 67  | 37,696 | 55,032 | Deciduous forest                          |
| 68  | 37,538 | 55,113 | Coniferous forest                         |
| 69  | 37,438 | 55,244 | Coniferous forest                         |
| 70  | 37,659 | 55,221 | Deciduous forest                          |
| 71  | 37,694 | 55,365 | Coniferous forest                         |
| 72  | 37,794 | 55,528 | Coniferous forest                         |
| 73  | 37,361 | 56,631 | Mixed forest                              |
| 74  | 37,427 | 56,784 | Mixed forest                              |
| 75  | 37,549 | 56,735 | Coniferous forest                         |
| 76  | 37,860 | 56,828 | Spruce forest                             |
| 77  | 37,823 | 56,735 | Natural reservation “Zhuravlinaya rodina” |
| 78  | 38,128 | 56,725 | Mixed forest                              |
| 79  | 38,236 | 56,630 | Pine forest                               |
| 80  | 38,099 | 56,459 | Deciduous forest                          |
| 81  | 37,870 | 56,543 | Deciduous forest                          |
| 82  | 37,645 | 56,501 | Pine forest                               |
| 83  | 37,628 | 56,391 | Mixed forest                              |
| 84  | 37,900 | 56,389 | Mixed forest                              |
| 85  | 38,347 | 56,454 | Mixed forest                              |
| 86  | 38,353 | 56,326 | Mixed forest                              |
| 87  | 38,105 | 56,371 | Spruce forest                             |
| 88  | 37,914 | 56,247 | Spruce forest                             |
| 89  | 38,216 | 56,218 | Spruce forest                             |
| 90  | 37,742 | 56,156 | Mixed forest                              |
| 91  | 37,805 | 56,118 | Coniferous forest                         |
| 92  | 38,082 | 56,129 | Spruce forest                             |
| 93  | 38,186 | 56,038 | Pine forest                               |
| 94  | 38,384 | 56,139 | Coniferous forest                         |
| 95  | 38,543 | 55,966 | Mixed forest                              |
| 96  | 38,481 | 55,883 | Coniferous forest                         |
| 97  | 38,242 | 55,827 | Mixed forest                              |
| 98  | 38,400 | 55,923 | Mixed forest                              |
| 99  | 38,464 | 55,711 | Mixed forest                              |
| 100 | 38,666 | 55,678 | Pine forest                               |
| 101 | 38,461 | 55,835 | Spruce forest                             |
| 102 | 38,695 | 55,871 | Mixed forest                              |
| 103 | 38,698 | 55,780 | Mixed forest                              |
| 104 | 38,922 | 55,890 | Coniferous forest                         |
| 105 | 39,036 | 55,830 | Mixed forest                              |
| 106 | 39,293 | 55,707 | Pine forest                               |
| 107 | 39,002 | 55,652 | Deciduous forest                          |
| 108 | 38,872 | 55,520 | Pine forest                               |
| 109 | 39,107 | 55,392 | Spruce forest                             |
| 110 | 39,144 | 55,532 | Coniferous forest                         |
| 111 | 39,410 | 55,596 | Pine forest                               |
| 112 | 39,714 | 55,725 | Mixed forest                              |
| 113 | 39,890 | 55,655 | Pine forest                               |

|     |        |        |                   |
|-----|--------|--------|-------------------|
| 114 | 40,005 | 55,527 | Mixed forest      |
| 115 | 39,669 | 55,566 | Spruce forest     |
| 116 | 39,397 | 55,415 | Coniferous forest |
| 117 | 39,707 | 55,459 | Birch forest      |
| 118 | 40,030 | 55,374 | Pine forest       |
| 119 | 40,019 | 55,259 | Mixed forest      |
| 120 | 39,735 | 55,186 | Mixed forest      |
| 121 | 39,756 | 55,271 | Mixed forest      |
| 122 | 39,601 | 55,352 | Spruce forest     |
| 123 | 39,119 | 55,282 | Spruce forest     |
| 124 | 39,434 | 55,238 | Pine forest       |
| 125 | 39,605 | 55,137 | Birch forest      |
| 126 | 39,383 | 55,035 | Pine forest       |
| 127 | 39,161 | 54,899 | Mixed forest      |
| 128 | 39,078 | 54,988 | Pine forest       |
| 129 | 38,554 | 55,142 | Mixed forest      |
| 130 | 38,267 | 55,110 | Birch forest      |
| 131 | 38,421 | 55,239 | Mixed forest      |
| 132 | 38,162 | 55,273 | Mixed forest      |
| 133 | 38,094 | 55,441 | Deciduous forest  |
| 134 | 37,947 | 55,573 | Pine forest       |
| 135 | 37,951 | 55,361 | Birch forest      |
| 136 | 37,990 | 55,159 | Mixed forest      |
| 137 | 38,090 | 55,025 | Mixed forest      |
| 138 | 38,322 | 54,871 | Mixed forest      |
| 139 | 38,448 | 54,964 | Birch forest      |
| 140 | 38,550 | 54,913 | Mixed forest      |
| 141 | 38,739 | 54,951 | Deciduous forest  |
| 142 | 38,834 | 55,180 | Mixed forest      |
| 143 | 38,732 | 55,355 | Mixed forest      |
| 144 | 38,502 | 55,444 | Pine forest       |
| 145 | 38,655 | 55,538 | Pine forest       |
| 146 | 38,370 | 55,624 | Mixed forest      |
| 147 | 38,092 | 55,662 | Mixed forest      |
| 148 | 38,020 | 55,862 | Mixed forest      |
| 149 | 37,923 | 55,992 | Pine forest       |
| 150 | 37,634 | 55,973 | Spruce forest     |
| 151 | 37,580 | 56,080 | Spruce forest     |
| 152 | 37,493 | 56,178 | Deciduous forest  |
| 153 | 36,874 | 56,297 | Mixed forest      |
| 154 | 37,657 | 56,312 | Birch forest      |
| 155 | 37,595 | 56,653 | Mixed forest      |
| 156 | 37,165 | 56,708 | Spruce forest     |
